# Supplementary figures and images for: Surface modification of uniaxial cyclic strain cell culture platform with temperature-responsive polymer for cell sheet detachment
Source: Royal Society of Chemistry journal article supplement (doi:10.1039/c5tb01171j), 2015-01-01

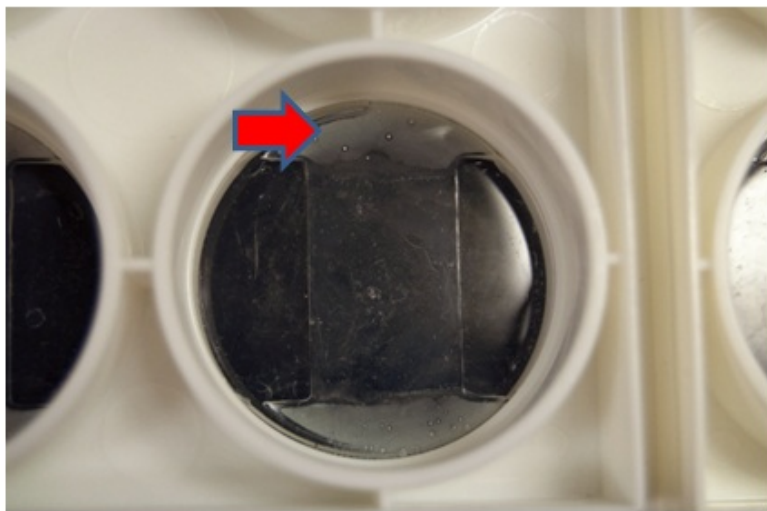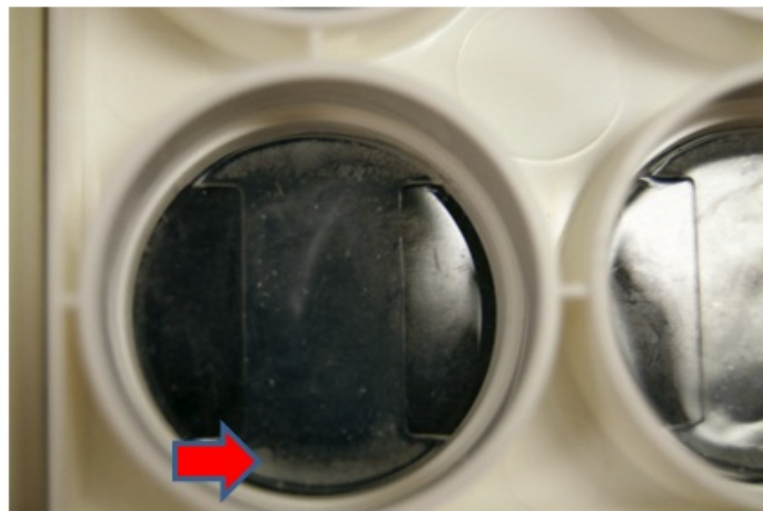

Supplement: c5tb01171j2.pdf [file c5tb01171j2.pdf]

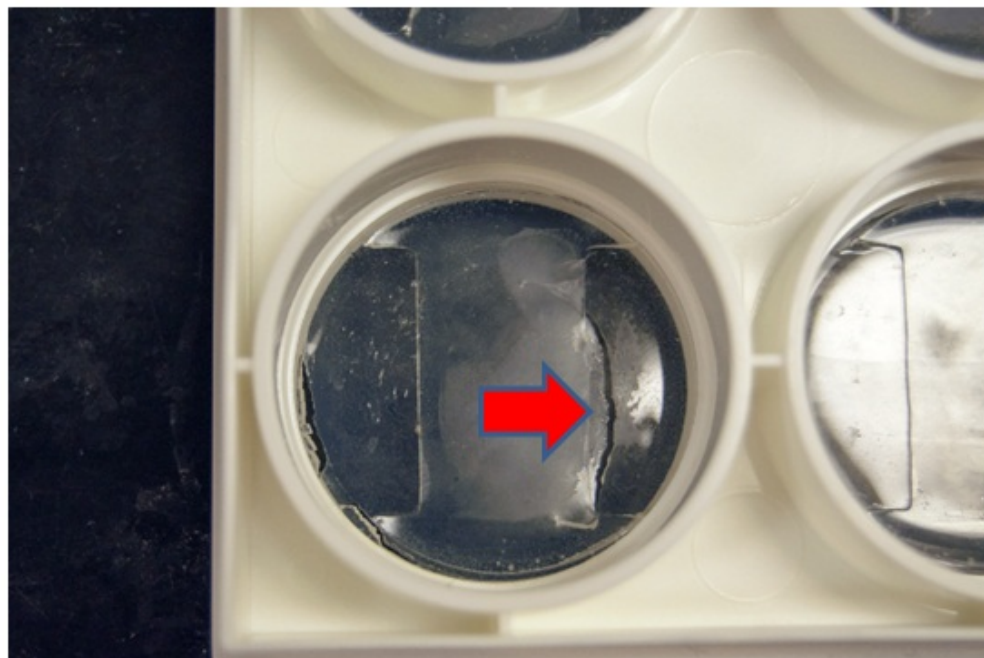

Supplement: c5tb01171j3.pdf [file c5tb01171j3.pdf]
